# Supplementary figures and images for: The GDP-dependent Rab27a effector coronin 3 controls endocytosis of secretory membrane in insulin-secreting cell lines
Source: Oxford University Press journal article supplement (doi:10.1242/jcs.030544), 2008-09-03

**Phogrin**

**LacZ**

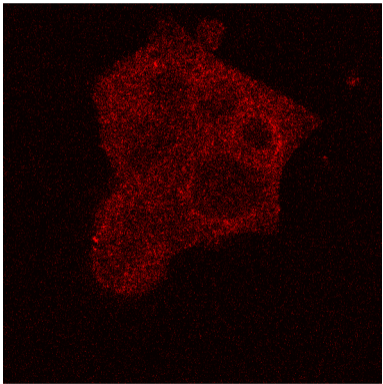

**$\Delta C$**

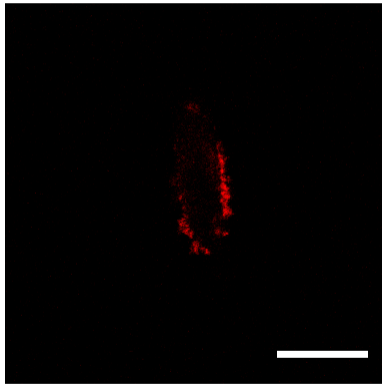

Supplement: jcs030544-sup-030544-figs3.pdf [file jcs030544-sup-030544-figs3.pdf]
